# Supplementary material for: Improving crystallization and processability of PBS via slight cross-linking
Source: Royal Society of Chemistry journal article supplement (doi:10.1039/c6ra13488b), 2016-01-01
Supplement: c6ra13488b1.pdf [file c6ra13488b1.pdf]

## Supporting Information

### Improving Crystallization and Processability of PBS via Slightly Cross-linking

Gui-Cheng Liu, Wen-Qiang Zhang, Shui-Lian Zhou, Xiu-Li Wang\*, Yu-Zhong  
Wang\*

Center for Degradable and Flame-Retardant Polymeric Materials (ERCPM-MoE),  
College of Chemistry, State Key Laboratory of Polymer Materials Engineering,  
National Engineering Laboratory of Eco-Friendly Polymeric Materials (Sichuan),  
Sichuan University, 29 Wangjiang Road, Chengdu 610064, China

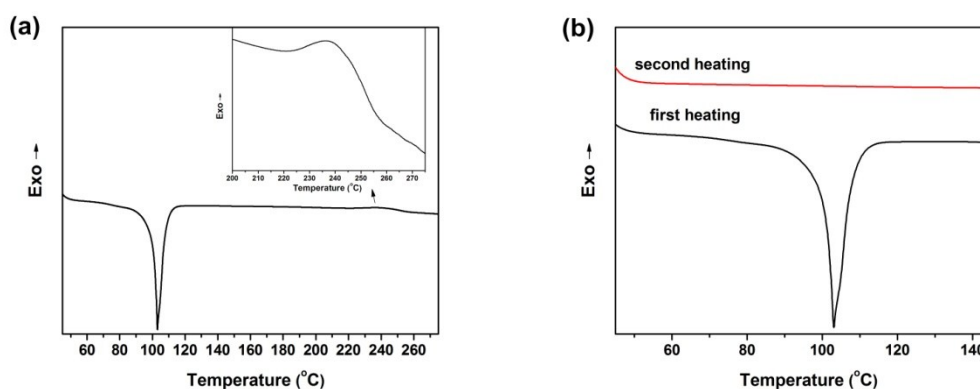

**Fig. S1. DSC (a) first heating scan and (b) the first and the second heating scan for monomer DTS**

The sample (5 mg) was first heated to 280 °C (the first heating scan) at the heating rate of 20 °C min<sup>-1</sup>, and then cooled to 40 °C at a cooling rate of 20 °C min<sup>-1</sup> (cooling scan), and finally the sample was heated again to 150 °C at the heating rate of 20 °C min<sup>-1</sup> (the second heating scan).

From Figure S1, we can obviously see that there was a clear melting peak at 103 °C and an exothermic peak around at the temperature range of 225 °C and 255 °C in the first heating scan of DTS. While in the second heating scan the melting peak was disappeared. This illustrates that during the first scan DTS cross-linked at 225 °C- 255 °C temperature region due to the existence of alkynyl group, which made its melting peak vanish.

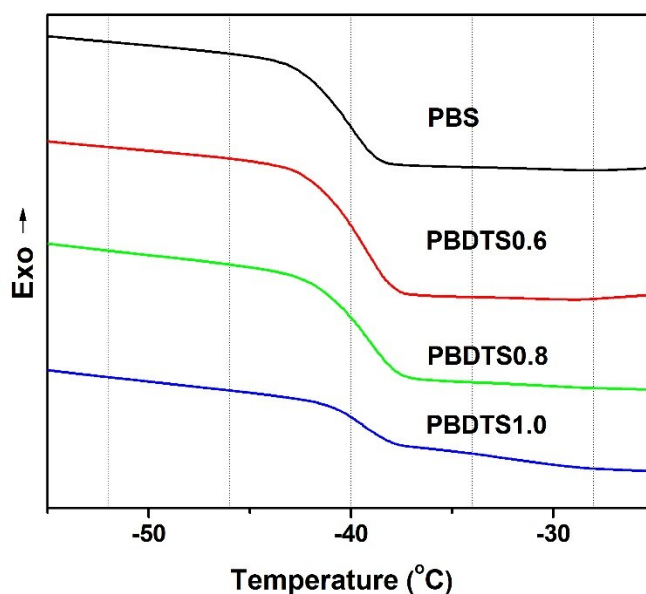

**Fig. S2. DSC curves (from -50 to 30 °C) of second heating run of neat PBS and PBDTSx at a rate of 10 °C min<sup>-1</sup>.**

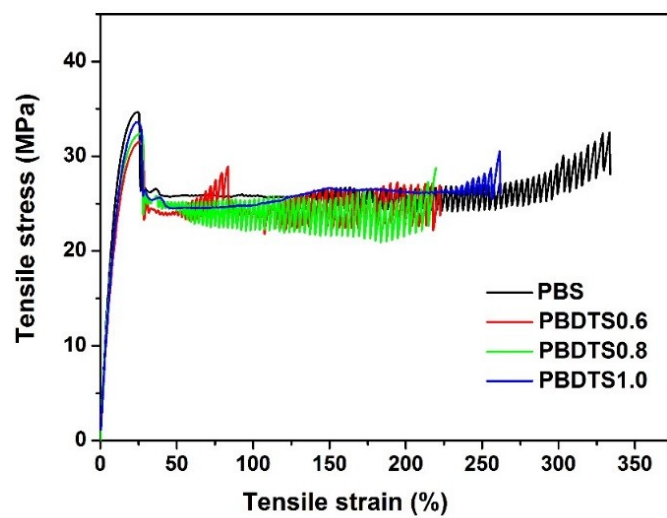

Fig. S3. The stress-strain curves of neat PBS and PBDTSx.
